# Supplementary material for: Body Surface Area-Based Dosing of Mycophenolate Mofetil in Pediatric Hematopoietic Stem Cell Transplant Recipients: A Prospective Population Pharmacokinetic Study
Source: MDPI journal article supplement (doi:10.3390/pharmaceutics15122741), 2023-12-07
Supplement: s1 [file s1]

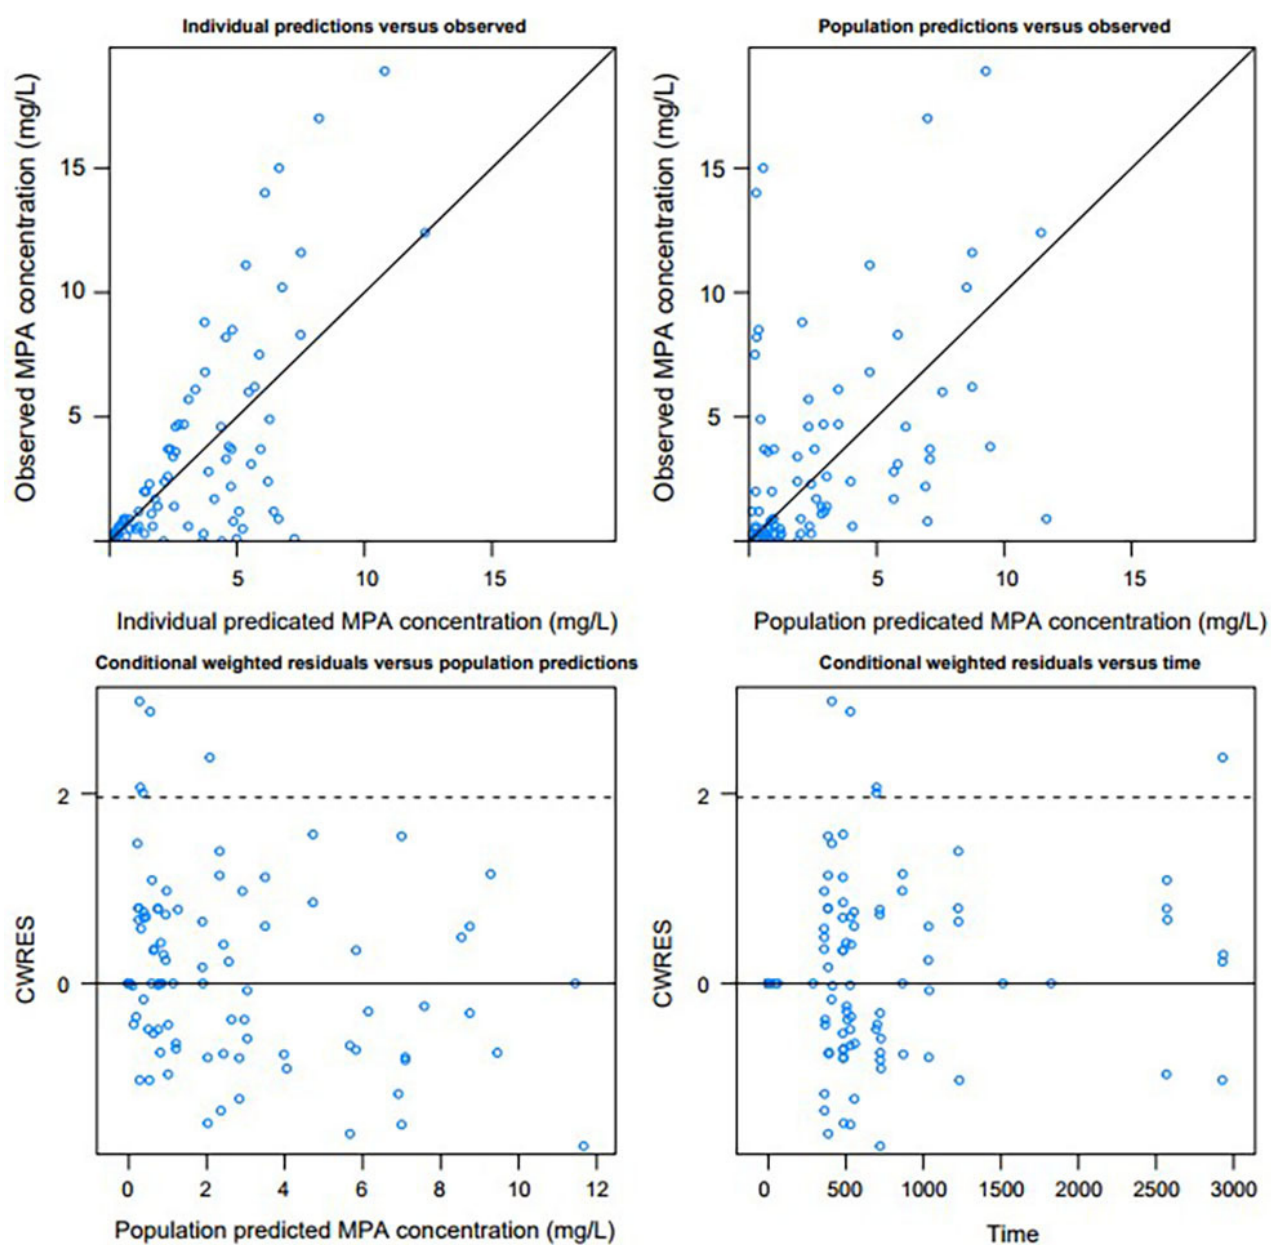

**Figure S1.** Goodness-of-fit plots of a structural model. MPA, mycophenolic acid; CWRES, conditional weighted residuals.

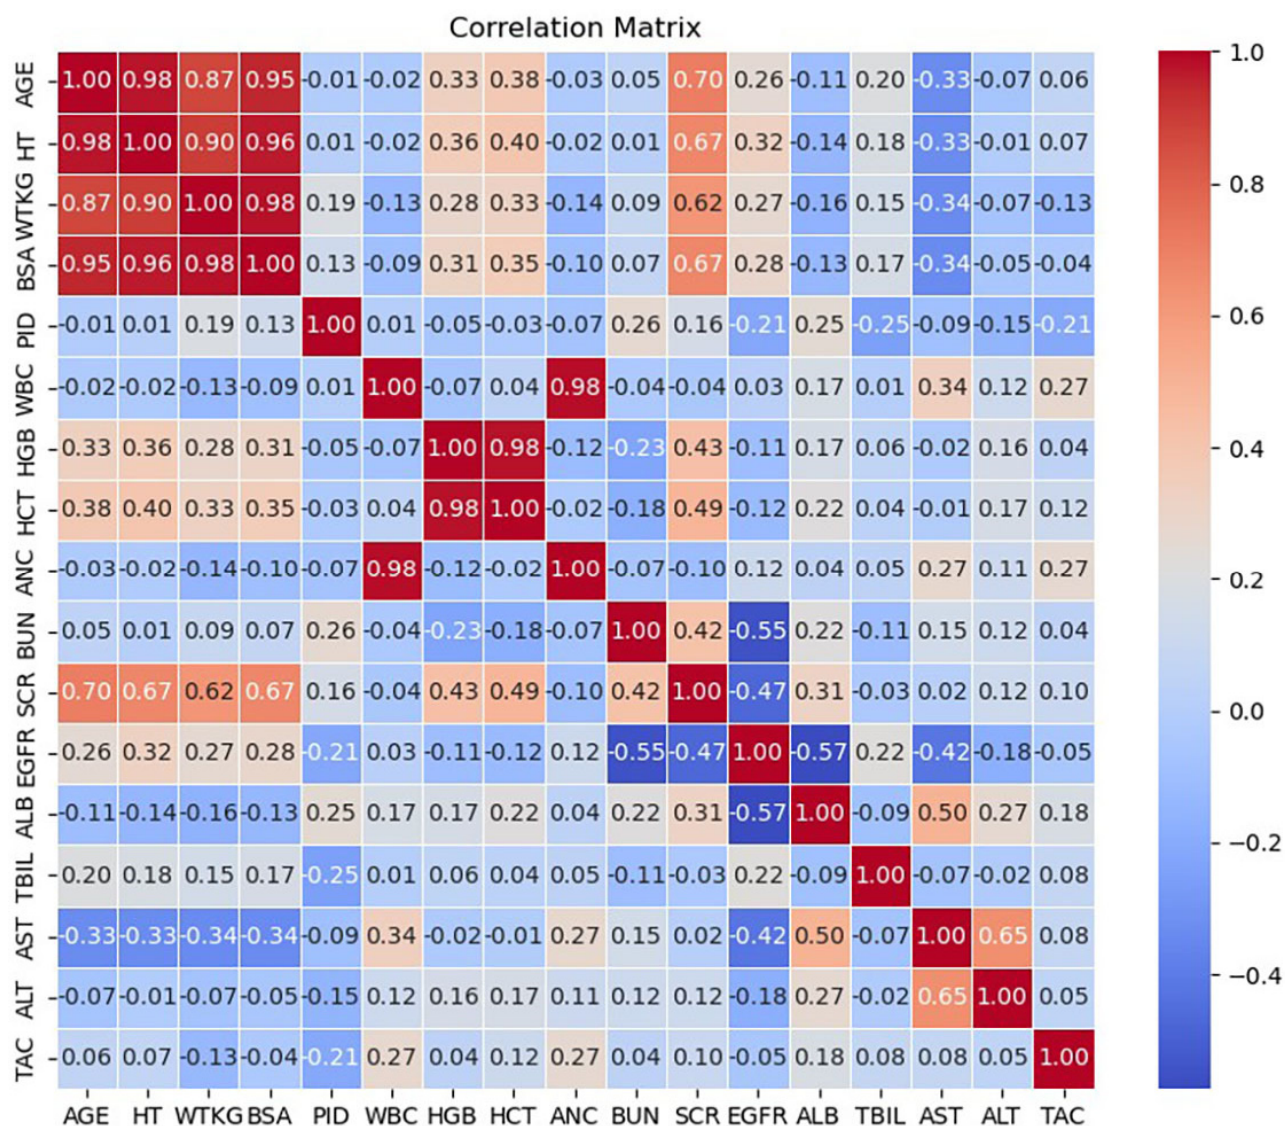

**Figure S2.** Correlation matrix of covariates. HT, height; WTKG, weight in kilograms; BSA, body surface area; PID, post hematopoietic stem cell infusion days; WBC, white blood cell count; HGB, hemoglobin; HCT, hematocrit; ANC, absolute neutrophil count; BUN, blood urea nitrogen; SCR, serum creatinine; EGFR, estimated glomerular filtration rate; ALB, albumin; TBIL, total bilirubin; AST, aspartate aminotransferase; ALT, alanine transaminase; TAC, tacrolimus trough concentration.
